# Supplementary material
Source: publisher site journal article supplement (https://www.dovepress.com/article/452498)
Supplement: Supplementary file 1 [file get_supplementary_file.php]

## **Supplementary Material**

# **Estimated pulse wave velocity as a novel non-invasive biomarker for metabolic syndrome among people living with HIV**

Suling Chen, Yuanhui Jiang, Xiaoli Lin, Hongjie Chen, Xiaoxuan Wu, Zhe Qian, Xuwen  
Xu, Huiqun Zhong, Jie Peng, Shaohang Cai

**Supplementary Table 1: Demographics and clinical characteristics of participants grouped by the new cutoff of ePWV.**

| Characteristics                        | Overall<br>(N = 485) | Normal risk of MetS<br>(N = 284) | High risk of MetS<br>(N = 201) | P value          |
|----------------------------------------|----------------------|----------------------------------|--------------------------------|------------------|
| Age, years                             | 35.43 ± 12.01        | 28.63 ± 5.91                     | 45.03 ± 11.88                  | <b>&lt;0.001</b> |
| Sex, male                              | 447 (92.16%)         | 266 (93.66%)                     | 181(90.05%)                    | 0.145            |
| Smoking                                | 150 (36.14%)         | 75 (30.61%)                      | 75 (44.12%)                    | <b>0.005</b>     |
| Alcoholism                             | 77 (18.51%)          | 44 (17.96%)                      | 33 (19.30%)                    | 0.729            |
| Regularly exercise                     | 159 (38.22%)         | 88 (35.92%)                      | 71 (41.52%)                    | 0.247            |
| Sleep deprivation                      | 68 (16.35%)          | 38 (15.51%)                      | 30 (17.54%)                    | 0.581            |
| Anxiety/depression                     | 91 (21.88%)          | 54 (22.04%)                      | 37 (21.64%)                    | 0.922            |
| CVD Family history                     | 152 (36.54%)         | 72 (29.39%)                      | 80 (46.78%)                    | <b>&lt;0.001</b> |
| BMI, kg/m <sup>2</sup>                 | 22.23 [19.75, 24.49] | 21.28 [18.92, 23.76]             | 23.24 [21.05, 25.65]           | <b>&lt;0.001</b> |
| SBP, mmHg                              | 126.32 ± 13.42       | 120.37 ± 9.28                    | 134.74 ± 13.87                 | <b>&lt;0.001</b> |
| DBP, mmHg                              | 86.44 ± 9.72         | 83.08 ± 8.11                     | 91.17 ± 9.85                   | <b>&lt;0.001</b> |
| MBP, mmHg                              | 102.02 ± 10.03       | 97.64 ± 7.35                     | 108.21 ± 10.07                 | <b>&lt;0.001</b> |
| AIDS stage                             | 213 (43.92%)         | 127 (44.72%)                     | 86 (42.79%)                    | 0.673            |
| CD4+ T counts, cells/μl                | 799.70 ± 351.37      | 815.10 ± 350.85                  | 777.95 ± 351.82                | 0.252            |
| CD8+ T counts, cells/μl                | 492.59 ± 233.91      | 526.02 ± 232.69                  | 445.34 ± 227.94                | <b>&lt;0.001</b> |
| HAART duration, months                 | 27.08 ± 18.57        | 26.26 ± 18.59                    | 28.23 ± 18.53                  | 0.250            |
| Viral load (log <sub>10</sub> ), UI/ml | 2.00 [2.00, 2.00]    | 2.00 [2.00, 2.00]                | 2.00 [2.00, 2.00]              | 0.537            |
| CAP, dB/m                              | 222.83 ± 49.84       | 211.86 ± 44.50                   | 238.33 ± 52.87                 | <b>&lt;0.001</b> |

|                                 |                   |                   |                   |                  |
|---------------------------------|-------------------|-------------------|-------------------|------------------|
| LSM, kPa                        | 5.21 ± 1.31       | 5.04 ± 0.87       | 5.45 ± 1.73       | <b>0.002</b>     |
| TG, mmol/L                      | 1.67 ± 1.22       | 1.40 ± 0.83       | 2.05 ± 1.55       | <b>&lt;0.001</b> |
| CHOL, mmol/L                    | 4.33 ± 0.95       | 4.16 ± 0.81       | 4.56 ± 1.08       | <b>&lt;0.001</b> |
| HDL-C, mmol/L                   | 1.15 ± 0.23       | 1.18 ± 0.24       | 1.11 ± 0.21       | <b>&lt;0.001</b> |
| LDL-C, mmol/L                   | 2.77 ± 0.74       | 2.64 ± 0.65       | 2.95 ± 0.82       | <b>&lt;0.001</b> |
| ALT, U/L                        | 28.99 ± 24.28     | 28.89 ± 27.82     | 29.14 ± 18.21     | 0.904            |
| AST, U/L                        | 24.36 ± 15.01     | 24.08 ± 17.94     | 24.75 ± 9.46      | 0.599            |
| FPG, mmol/L                     | 5.15 [4.84, 5.58] | 5.07 [4.77, 5.36] | 5.31 [4.99, 5.97] | <b>&lt;0.001</b> |
| HbA1c, %                        | 5.49 ± 0.85       | 5.27 ± 0.49       | 5.79 ± 1.13       | <b>&lt;0.001</b> |
| UA, μmmol/L                     | 369.46 ± 90.86    | 377.35 ± 87.73    | 358.31 ± 94.20    | <b>0.025</b>     |
| eGFR, mL/min/1.73m <sup>2</sup> | 103.78 ± 18.06    | 110.75 ± 14.68    | 93.94 ± 17.84     | <b>&lt;0.001</b> |

**Notes,** Continuous variables are expressed as mean ± standard deviation or median [interquartile range], and categorical variables are expressed as n (%). Bold text indicates P value < 0.05.

**Abbreviations,** CVD, cardiovascular disease; BMI, body mass index; MBP, mean blood pressure; SBP, systolic blood pressure; DBP, diastolic blood pressure; AIDS, acquired immunodeficiency syndrome; HAART, highly active antiretroviral therapy; CAP, controlled attenuation parameter; LSM, liver stiffness measurement; TG, total triglycerides; CHOL, total cholesterol; HDL-C, High-density lipoprotein cholesterol; LDL-C, Low-density lipoprotein cholesterol; ALT, alanine aminotransferase; AST, aspartic aminotransferase; FPG, Fasting plasma glucose; HbA1c, glycated hemoglobin A1c; UA, uric acid; eGFR, estimated glomerular filtration rate.

**Supplementary Table 2: Traditional threshold and new threshold of ePWV on diagnosis of MetS.**

| Comparison                                 |                 | MetS of Diagnosis |             |       |
|--------------------------------------------|-----------------|-------------------|-------------|-------|
|                                            |                 | Non-MetS          | Mets        | Total |
| Traditional threshold<br>(ePWV = 10.0 m/s) | < 10 m/s        | 398 (94.09%)      | 56 (90.32%) | 454   |
|                                            | ≥ 10 m/s        | 25 (5.91%)        | 6 (9.68%)   | 31    |
|                                            | Total           | 423               | 62          | 485   |
|                                            | Chi-square test |                   | P = 0.265   |       |
| New threshold<br>(ePWV = 7.4 m/s)          | < 7.4 m/s       | 271 (64.07%)      | 13 (20.97%) | 284   |
|                                            | ≥ 7.4 m/s       | 152 (35.93%)      | 49 (79.03%) | 201   |
|                                            | Total           | 423               | 62          | 485   |
|                                            | Chi-square test |                   | P < 0.001   |       |

**Abbreviations,** ePWV, estimated pulse wave velocity; MetS, metabolic syndrome.

**Supplementary Figure 1: Study flow diagram for inclusion of participants.**

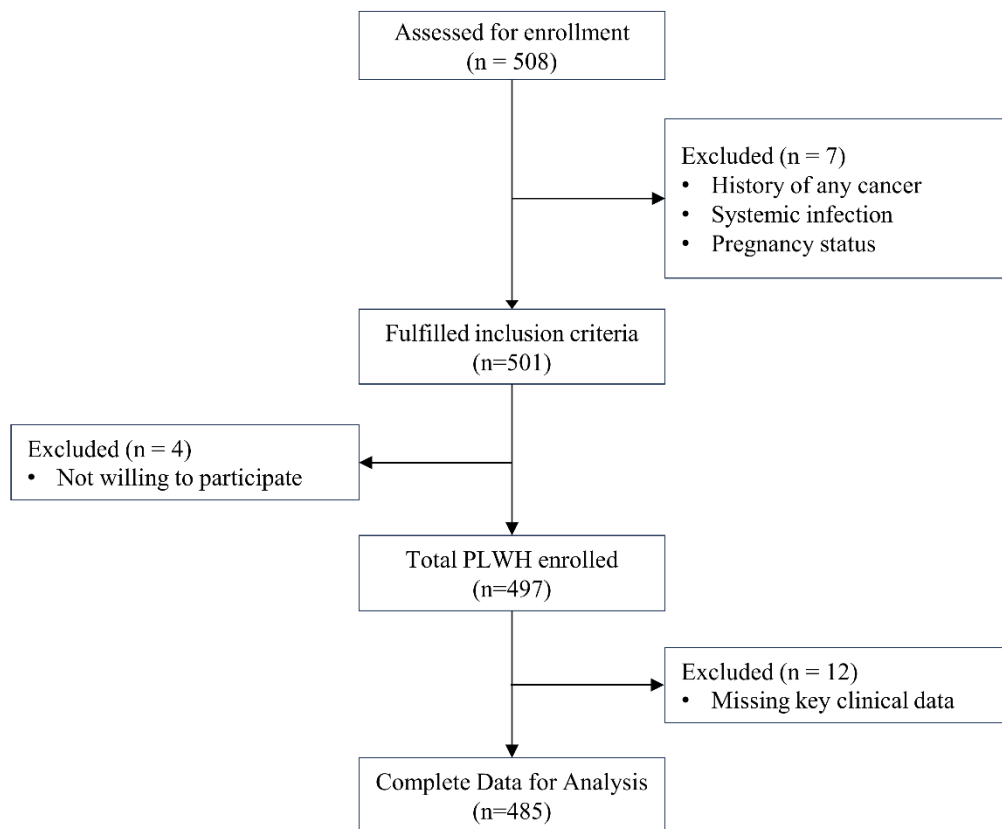

Abbreviations: PLWH, people living with HIV.

**Supplementary Figure 2: Correlation and diagnostic ability of ePWV and baPWV in PLWH.**

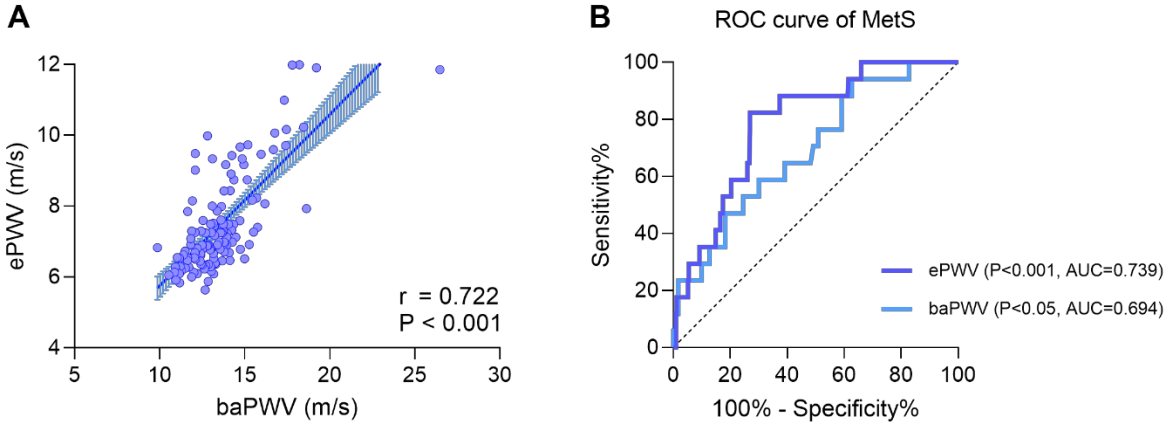

(A) Scatter plot of ePWV and baPWV level. (B) The ROC curve of MetS relating to ePWV and baPWV level. Abbreviations: ePWV, estimated pulse wave velocity; baPWV, brachial-ankle pulse wave velocity; MetS, metabolic syndrome.

**Supplementary Figure 3: The influence of HIV infection and HAART between PLWH with or without MetS.**

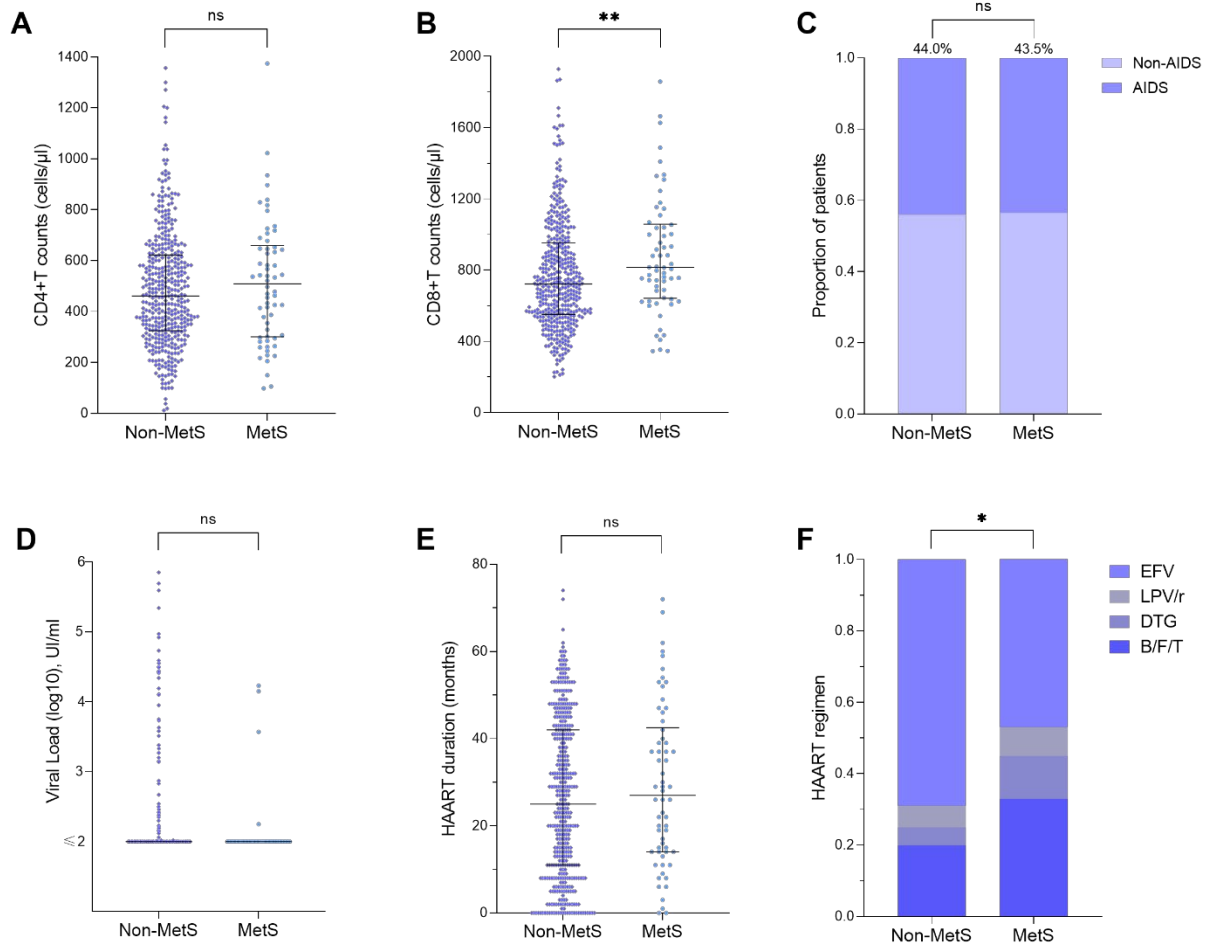

(A) CD4+T counts level in PLWH between non-MetS group and MetS group (461.00 [325.50, 621.50] versus 509.00 [303.25, 651.75];  $P > 0.05$ ). (B) CD8+T counts level in PLWH between non-MetS group and MetS group (722.00 [552.50, 950.00] versus 816.00 [654.25, 1051.25];  $P < 0.01$ ). (C) The proportion of PLWH in AIDS stage between non-MetS group and MetS group (186 (43.97%) versus 27 (43.55%);  $P > 0.05$ ). (D) HIV viral load level in PLWH between non-MetS group and MetS group (2.00 [2.00, 2.00] versus 2.00 [2.00, 2.00];  $P > 0.05$ ). (E) HAART duration in PLWH between non-MetS group and MetS group (25.00 [11.00, 42.00] versus 27.00 [14.00, 41.50];  $P > 0.05$ ). (F) The proportion of PLWH with different HAART regimens between non-MetS group and MetS group ( $P < 0.05$ ).

Abbreviations: ePWV, estimated pulse wave velocity; AIDS, acquired immunodeficiency syndrome; HAART, highly active antiretroviral therapy; EFV, Efavirenz group; LPV/r, lopinavir/ritonavir group; DTG, dolutegravir group; B/F/T, Bictegravir group.
